# Supplementary material
Source: HighWire-hosted journal article supplement (https://www.cmaj.ca/content/suppl/2015/07/27/cmaj.141608)
Supplement: 141608-res-3-at.pdf [file 141608-res-3-at.pdf]

**Appendix 3 (as supplied by the authors):** OMQ14 individual item responses at baseline and 3 months by group.

|                                                                                                      | <i>Baseline</i> |       |               |       | <i>3 months</i> |       |               |       |
|------------------------------------------------------------------------------------------------------|-----------------|-------|---------------|-------|-----------------|-------|---------------|-------|
|                                                                                                      | Standard care   |       | Autoinflation |       | Standard care   |       | Autoinflation |       |
|                                                                                                      | n               | (%)   | n             | (%)   | n               | (%)   | n             | (%)   |
| <b>Over the last 3 months, taking everything into account, how has your child's health has been?</b> |                 |       |               |       |                 |       |               |       |
| Missing                                                                                              | 6               | 3.8%  | 6             | 3.8%  | 37              | 23.1% | 33            | 20.6% |
| Very good                                                                                            | 53              | 33.1% | 38            | 23.8% | 61              | 38.1% | 68            | 42.5% |
| Good                                                                                                 | 73              | 45.6% | 91            | 56.9% | 54              | 33.8% | 51            | 31.9% |
| Only fair, or poor                                                                                   | 28              | 17.5% | 25            | 15.6% | 8               | 5.0%  | 8             | 5.0%  |
| <b>How many times has he/she had trouble with his/her ears?</b>                                      |                 |       |               |       |                 |       |               |       |
| Missing                                                                                              | 6               | 3.8%  | 6             | 3.8%  | 37              | 23.1% | 34            | 21.3% |
| Not at all                                                                                           | 41              | 25.6% | 34            | 21.3% | 38              | 23.8% | 48            | 30.0% |
| Once                                                                                                 | 40              | 25.0% | 43            | 26.9% | 23              | 14.4% | 31            | 19.4% |
| 2-3 times                                                                                            | 51              | 31.9% | 51            | 31.9% | 37              | 23.1% | 34            | 21.3% |
| 4 or more times                                                                                      | 22              | 13.8% | 26            | 16.3% | 25              | 15.6% | 13            | 8.1%  |
| <b>How many ear infections has he/she had?</b>                                                       |                 |       |               |       |                 |       |               |       |
| Missing                                                                                              | 6               | 3.8%  | 7             | 4.4%  | 36              | 22.5% | 33            | 20.6% |
| 0                                                                                                    | 78              | 48.8% | 76            | 47.5% | 89              | 55.6% | 96            | 60.0% |
| 1                                                                                                    | 50              | 31.3% | 44            | 27.5% | 23              | 14.4% | 18            | 11.3% |
| 2-3                                                                                                  | 19              | 11.9% | 26            | 16.3% | 10              | 6.3%  | 11            | 6.9%  |
| 4 or more                                                                                            | 7               | 4.4%  | 7             | 4.4%  | 2               | 1.3%  | 2             | 1.3%  |
| <b>How many times has he/she had an earache?</b>                                                     |                 |       |               |       |                 |       |               |       |
| Missing                                                                                              | 6               | 3.8%  | 8             | 5.0%  | 37              | 23.1% | 33            | 20.6% |
| 0                                                                                                    | 44              | 27.5% | 41            | 25.6% | 50              | 31.3% | 56            | 35.0% |
| 1                                                                                                    | 37              | 23.1% | 38            | 23.8% | 33              | 20.6% | 25            | 15.6% |
| 2-3                                                                                                  | 45              | 28.1% | 48            | 30.0% | 25              | 15.6% | 32            | 20.0% |
| 4 or more                                                                                            | 28              | 17.5% | 25            | 15.6% | 15              | 9.4%  | 14            | 8.8%  |

|                                                                                          |    |       |    |       |    |       |    |       |  |
|------------------------------------------------------------------------------------------|----|-------|----|-------|----|-------|----|-------|--|
| <b>How would you describe your child's hearing?</b>                                      |    |       |    |       |    |       |    |       |  |
| Missing                                                                                  | 6  | 3.8%  | 9  | 5.6%  | 37 | 23.1% | 34 | 21.3% |  |
| Normal                                                                                   | 43 | 26.9% | 29 | 18.1% | 40 | 25.0% | 53 | 33.1% |  |
| Slightly below normal                                                                    | 77 | 48.1% | 92 | 57.5% | 65 | 40.6% | 60 | 37.5% |  |
| Poor                                                                                     | 26 | 16.3% | 23 | 14.4% | 14 | 8.8%  | 10 | 6.3%  |  |
| Very poor                                                                                | 3  | 1.9%  | 6  | 3.8%  | 4  | 2.5%  | 2  | 1.3%  |  |
| Not sure                                                                                 | 5  | 3.1%  | 1  | 0.6%  | 0  | 0.0%  | 1  | 0.6%  |  |
| <b>Has he/she mis-heard words when not looking at you?</b>                               |    |       |    |       |    |       |    |       |  |
| Missing                                                                                  | 6  | 3.8%  | 8  | 5.0%  | 37 | 23.1% | 33 | 20.6% |  |
| No                                                                                       | 13 | 8.1%  | 9  | 5.6%  | 18 | 11.3% | 25 | 15.6% |  |
| Rarely                                                                                   | 48 | 30.0% | 40 | 25.0% | 43 | 26.9% | 57 | 35.6% |  |
| Often                                                                                    | 84 | 52.5% | 88 | 55.0% | 54 | 33.8% | 41 | 25.6% |  |
| Always                                                                                   | 6  | 3.8%  | 10 | 6.3%  | 8  | 5.0%  | 4  | 2.5%  |  |
| Not sure                                                                                 | 3  | 1.9%  | 5  | 3.1%  | 0  | 0.0%  | 0  | 0.0%  |  |
| <b>Has he/she had difficulty hearing when with a group of people?</b>                    |    |       |    |       |    |       |    |       |  |
| Missing                                                                                  | 6  | 3.8%  | 8  | 5.0%  | 37 | 23.1% | 34 | 21.3% |  |
| No                                                                                       | 35 | 21.9% | 22 | 13.8% | 27 | 16.9% | 49 | 30.6% |  |
| Rarely                                                                                   | 41 | 25.6% | 40 | 25.0% | 50 | 31.3% | 45 | 28.1% |  |
| Often                                                                                    | 56 | 35.0% | 63 | 39.4% | 33 | 20.6% | 23 | 14.4% |  |
| Always                                                                                   | 6  | 3.8%  | 11 | 6.9%  | 10 | 6.3%  | 5  | 3.1%  |  |
| Not sure                                                                                 | 16 | 10.0% | 16 | 10.0% | 3  | 1.9%  | 4  | 2.5%  |  |
| <b>How long can he/she concentrate on a game or a task you have given him/her to do?</b> |    |       |    |       |    |       |    |       |  |
| Missing                                                                                  | 7  | 4.4%  | 7  | 4.4%  | 40 | 25.0% | 35 | 21.9% |  |
| Up to 2 minutes                                                                          | 7  | 4.4%  | 7  | 4.4%  | 3  | 1.9%  | 8  | 5.0%  |  |
| Up to 5 minutes                                                                          | 22 | 13.8% | 20 | 12.5% | 14 | 8.8%  | 14 | 8.8%  |  |
| 5-10 minutes                                                                             | 38 | 23.8% | 42 | 26.3% | 30 | 18.8% | 33 | 20.6% |  |
| 10-15 minutes                                                                            | 32 | 20.0% | 24 | 15.0% | 25 | 15.6% | 28 | 17.5% |  |
| More than 15 minutes                                                                     | 54 | 33.8% | 60 | 37.5% | 48 | 30.0% | 42 | 26.3% |  |

|                                                                                              |     |       |     |       |    |       |     |       |
|----------------------------------------------------------------------------------------------|-----|-------|-----|-------|----|-------|-----|-------|
| <b>How often does he/she seek your attention unnecessarily?</b>                              |     |       |     |       |    |       |     |       |
| Missing                                                                                      | 8   | 5.0%  | 9   | 5.6%  | 39 | 24.4% | 34  | 21.3% |
| Less than once a month                                                                       | 36  | 22.5% | 32  | 20.0% | 32 | 20.0% | 48  | 30.0% |
| Once a month                                                                                 | 17  | 10.6% | 14  | 8.8%  | 19 | 11.9% | 26  | 16.3% |
| Once a week                                                                                  | 31  | 19.4% | 40  | 25.0% | 20 | 12.5% | 23  | 14.4% |
| Once a day                                                                                   | 34  | 21.3% | 34  | 21.3% | 27 | 16.9% | 17  | 10.6% |
| Two or more times a day                                                                      | 34  | 21.3% | 31  | 19.4% | 23 | 14.4% | 12  | 7.5%  |
| <b>How often is he/she unhappy for no apparent reason?</b>                                   |     |       |     |       |    |       |     |       |
| Missing                                                                                      | 7   | 4.4%  | 9   | 5.6%  | 40 | 25.0% | 33  | 20.6% |
| Less than once a month                                                                       | 68  | 42.5% | 70  | 43.8% | 71 | 44.4% | 83  | 51.9% |
| Once a month                                                                                 | 19  | 11.9% | 18  | 11.3% | 13 | 8.1%  | 14  | 8.8%  |
| Once a week                                                                                  | 36  | 22.5% | 35  | 21.9% | 24 | 15.0% | 24  | 15.0% |
| Once or more per day                                                                         | 30  | 18.8% | 28  | 17.5% | 12 | 7.5%  | 6   | 3.8%  |
| <b>Has he/she mispronounced the beginnings or ends of words?</b>                             |     |       |     |       |    |       |     |       |
| Missing                                                                                      | 7   | 4.4%  | 8   | 5.0%  | 39 | 24.4% | 33  | 20.6% |
| No                                                                                           | 48  | 30.0% | 44  | 27.5% | 49 | 30.6% | 60  | 37.5% |
| Rarely                                                                                       | 56  | 35.0% | 63  | 39.4% | 44 | 27.5% | 44  | 27.5% |
| Often                                                                                        | 38  | 23.8% | 39  | 24.4% | 21 | 13.1% | 19  | 11.9% |
| Always                                                                                       | 11  | 6.9%  | 6   | 3.8%  | 7  | 4.4%  | 4   | 2.5%  |
| <b>Has his/her speech been behind (less developed than) that of children of similar age?</b> |     |       |     |       |    |       |     |       |
| Missing                                                                                      | 7   | 4.4%  | 7   | 4.4%  | 39 | 24.4% | 34  | 21.3% |
| No                                                                                           | 110 | 68.8% | 117 | 73.1% | 96 | 60.0% | 101 | 63.1% |
| A little                                                                                     | 29  | 18.1% | 19  | 11.9% | 15 | 9.4%  | 15  | 9.4%  |
| Moderately or a lot                                                                          | 10  | 6.3%  | 13  | 8.1%  | 8  | 5.0%  | 8   | 5.0%  |
| Not sure                                                                                     | 4   | 2.5%  | 4   | 2.5%  | 2  | 1.3%  | 2   | 1.3%  |

|                                                                  |     |       |     |       |    |       |     |       |  |
|------------------------------------------------------------------|-----|-------|-----|-------|----|-------|-----|-------|--|
| <b>Have you often felt tired?</b>                                |     |       |     |       |    |       |     |       |  |
| Missing                                                          | 8   | 5.0%  | 8   | 5.0%  | 38 | 23.8% | 35  | 21.9% |  |
| No                                                               | 42  | 26.3% | 44  | 27.5% | 43 | 26.9% | 55  | 34.4% |  |
| Yes                                                              | 110 | 68.8% | 108 | 67.5% | 79 | 49.4% | 70  | 43.8% |  |
| <b>Has your child needed more attention than other children?</b> |     |       |     |       |    |       |     |       |  |
| Missing                                                          | 7   | 4.4%  | 8   | 5.0%  | 38 | 23.8% | 34  | 21.3% |  |
| No                                                               | 110 | 68.8% | 107 | 66.9% | 94 | 58.8% | 106 | 66.3% |  |
| Yes                                                              | 43  | 26.9% | 45  | 28.1% | 28 | 17.5% | 20  | 12.5% |  |
